# Supplementary material
Source: PubMed Central journal article supplement (PMC3578054)
Supplement: NIHMS435418-supplement-1.pdf [file NIHMS435418-supplement-1.pdf]

## SUPPLEMENTAL MATERIAL

## Appendix

Computation of IBD probabilities based on observed genotype and individual ancestry proportion.

We assume that each SNP has exactly 2 alleles and that the admixed population derived from intermating between exactly 2 ancestral populations. We also assume that the individual ancestry proportions are known (without error) or have been estimated.

Let  $P_{ik}$  be the reference allele frequency of the  $i^{\text{th}}$  marker in the  $k^{\text{th}}$  ancestral population. Following this notation,  $P_{11}$  would be the frequency of the reference allele in ancestral population A and  $P_{21}$  would be the frequency of the reference allele in ancestral population B. We also have  $P_{12} = 1 - P_{11}$ ,  $P_{22} = 1 - P_{21}$  and  $\delta = \text{abs}(P_{11} - P_{21})$ . This quantity is known as the delta-value, a well-known measure of ancestry informativeness content. Note the delta-value almost never equal to 1 since there are very few perfectly informative markers.

Also, let  $G_{ij} = (g_1, g_2)$  be the observed genotype of the  $i^{\text{th}}$  individual at the  $j^{\text{th}}$  marker. Therefore, we have  $G_{ij} \in \{(1,1), (1,2), (2,1), (2,2)\}$ . Let  $\theta_i$  denote the probability that the  $i^{\text{th}}$  person comes from ancestral population "A". We need to determine the ancestry at a marker given the observed genotype. This ancestry can only be known probabilistically given the limited number of perfectly informative markers.

Let  $\pi_1$  (and  $\pi_2$ ) denote the probability that the first allele (and second allele respectively) is inherited for came from ancestral population "A". Finally we will use the notation  $Anc_{ij} = A$  to denote the event that the  $i^{\text{th}}$  individual inherited the  $j^{\text{th}}$  marker from ancestral population A. The ancestry at given marker can be computed by applied Bayes' theorem.

$$P(Anc_{ij} = A | g_s = t) = \frac{P(Anc_{ij} = A, g_s = t)}{P(g_s = t)} \quad (1)$$

$$P(Anc_{ij} = A | g_s = t) = \frac{P(Anc_{ij} = A)P(g_s = t | Anc_{ij} = A)}{P(Anc_{ij} = A)P(g_s = t | Anc_{ij} = A) + P(Anc_{ij} = B)P(g_s = t | Anc_{ij} = B)} \quad (2)$$

For  $s \in \{1, 2\}$  and  $t \in \{1, 2\}$ , we have:

$$\pi_1 = P(Anc_{ij} = A | g_1 = 1) = \frac{\theta_i p_{11}}{\theta_i p_{11} + (1 - \theta_i) p_{21}} \quad (4)$$

$$\pi_1 = P(Anc_{ij} = A | g_1 = 2) = \frac{\theta_i p_{21}}{\theta_i p_{21} + (1 - \theta_i) p_{22}} \quad (5)$$

$$\pi_2 = P(Anc_{ij} = A | g_2 = 1) = \frac{\theta_i p_{11}}{\theta_i p_{11} + (1 - \theta_i) p_{12}} \quad (6)$$

$$\pi_2 = P(Anc_{ij} = A | g_2 = 2) = \frac{\theta_i p_{21}}{\theta_i p_{21} + (1 - \theta_i) p_{22}} \quad (7)$$

Therefore, the probability the  $i^{th}$  individual inherits 0 allele from ancestral population A is.

$$P\{I_i(j=0)\} = (1 - \pi_1)(1 - \pi_2) \quad (8)$$

The probability the  $i^{th}$  individual inherits 1 allele from ancestral population A is.

$$P\{I_i(j=1)\} = (1 - \pi_1)\pi_2 + \pi_1(1 - \pi_2) \quad (9)$$

Finally, the probability the  $i^{th}$  individual inherits 2 alleles from ancestral population A is.

$$P\{I_i(j=2)\} = \pi_1\pi_2 \quad (10)$$

We can also code for typical mode of inheritances by noting the recessive model corresponds to  $P\{I_i(j=2)\}$ , the dominant model is equivalent to  $P\{I_i(j=1)\} + P\{I_i(j=2)\}$  and the additive model can be written as  $P\{I_i(j=1)\} + 2P\{I_i(j=2)\}$ .

**Supplemental Table 1: Characteristics of the combined cohort of participants**

| Variable                       | AA-DHS (N=635) |        |        | FHS (N=103) |        |        | MESA (N=302) |        |        | ALL (N=1040) |       |        | P-value <sup>1</sup> |
|--------------------------------|----------------|--------|--------|-------------|--------|--------|--------------|--------|--------|--------------|-------|--------|----------------------|
|                                | Mean           | SD     | Median | Mean        | SD     | Median | Mean         | SD     | Median | Mean         | SD    | Median |                      |
| Age (years)                    | 56.11          | 9.56   | 56     | 58.43       | 10.55  | 58     | 64.48        | 9.08   | 65.5   | 58.77        | 10.22 | 59     | <.0001               |
| Diabetes duration (years)      | 10.28          | 8.05   | 8      | 11.78       | 9.06   | 10     | 10.13        | 9.32   | 7      | 10.4         | 8.46  | 8      | 0.1476               |
| Hemoglobin A1c (%)             | 8.16           | 2.06   | 7.7    | NA          | NA     | NA     | 7.43         | 1.78   | 7      | 7.94         | 2.02  | 7.5    | <.0001               |
| High sensitivity CRP (mg/dl)   | 0.97           | 1.51   | 0.46   | 0.86        | 1.12   | 0.48   | 0.53         | 0.67   | 0.29   | 0.82         | 1.28  | 0.36   | <.0001               |
| Glucose, fasting (mg/dl)       | 150.26         | 65.8   | 134    | 156.83      | 66.73  | 139.00 | 155.98       | 53.98  | 146    | 152.57       | 62.68 | 138    | 0.0289               |
| HDL-cholesterol (mg/dl)        | 47.7           | 13.28  | 45     | 51.67       | 15.29  | 50.50  | 47.76        | 12.83  | 45     | 48.11        | 13.4  | 48.11  | 0.1351               |
| LDL-cholesterol (mg/dl)        | 108.37         | 36.42  | 103    | 105.55      | 35.00  | 101.00 | 114.12       | 34.22  | 114    | 109.77       | 35.73 | 107    | 0.0064               |
| Triglycerides (mg/dl)          | 128.93         | 124.47 | 104    | 122.66      | 80.70  | 98.50  | 130.92       | 114.27 | 106    | 128.89       | 117.8 | 104    | 0.7721               |
| BMI (kg/m <sup>2</sup> )       | 35.06          | 8.53   | 33.56  | 33.68       | 7.27   | 32.60  | 31.47        | 5.64   | 30.74  | 33.88        | 7.84  | 32.64  | <.0001               |
| CAC (original scale)           | 294.12         | 654.19 | 16     | 393.17      | 820.18 | 35.75  | 199.26       | 475.98 | 9.87   | 276.0        | 628.7 | 16.5   | 0.0009               |
| CAC (log <sub>10</sub> scale ) | 1.29           | 1.2    | 1.23   | 1.48        | 1.23   | 1.56   | 1.16         | 1.16   | 1.03   | 1.27         | 1.19  | 1.24   | 0.0009               |
| ACE inhibitor use (%)          | 40.6%          |        |        | 44.0%       |        |        | 42.1         |        |        | 41.4%        |       |        | 0.1817               |
| Current smoker (%)             | 24.3%          |        |        | 40.8%       |        |        | 16.6%        |        |        | 23.7%        |       |        | 0.00016              |
| Past Smoker (%)                | 37.2%          |        |        | 17.5%       |        |        | 38.1%        |        |        | 35.6%        |       |        | 0.00044              |
| Hypertension (%)               | 81.1%          |        |        | 91.3%       |        |        | 78.2%        |        |        | 82.3%        |       |        | 0.0193               |
| Lipid-lowering medication (%)  | 47.9%          |        |        | 36.9%       |        |        | 29.5%        |        |        | 44.8%        |       |        | <.0001               |
| CAC > 10 (%)                   | 52.1%          |        |        | 59.2%       |        |        | 49.7%        |        |        | 53.1%        |       |        | 0.0573               |

ACE – angiotensin converting enzyme inhibitor; BMI - body mass index; LDL - low density lipoprotein; HDL - high density lipoprotein; CAC – coronary artery calcified plaque; SD – standard deviation.

1: P-value of the Mann-Whitney test comparing the distribution of each variable in the 3 studies.

**Supplemental Table 2: Summary of LOD scores observed with coronary artery calcified plaque in African Americans with type 2 diabetes stratified by study.**

| SNP       | Chromosomal region | Nearest gene               | Outcome                | Study  |      |     | Meta-analysis LOD score |
|-----------|--------------------|----------------------------|------------------------|--------|------|-----|-------------------------|
|           |                    |                            |                        | AA-DHS | MESA | FHS |                         |
| rs6663966 | 1p32.3             | GLIS1                      | CAC < 10 vs. $\geq$ 10 | 3.9    | 0.0  | 0.0 | 2.6                     |
|           |                    |                            | Log(CAC+1)             | 5.0    | 0.1  | 0.1 | 4.0                     |
| rs7530895 | 1q32.1             | 61.9 kb from CHIT1         | CAC <10 vs. $\geq$ 10  | 3.0    | 0.3  | 0.8 | 3.7                     |
|           |                    |                            | Log(CAC+1)             | 2.2    | 0.2  | 0.8 | 2.9                     |
| rs9309717 | 2p25.3             | 6.611 kb from ADI1         | CAC <10 vs. $\geq$ 10  | 1.0    | 1.1  | 0.4 | 2.4                     |
|           |                    |                            | Log(CAC+1)             | 0.6    | 1.0  | 0.3 | 1.8                     |
| rs1712373 | 4q21.2             | 29.1 KB from PRKG2         | CAC <10 vs. $\geq$ 10  | 3.1    | 0.1  | 0.3 | 2.9                     |
|           |                    |                            | Log(CAC+1)             | 3.3    | 0.1  | 0.8 | 3.6                     |
| rs1872861 | 4q31.1             | 78.4 kb from TBC1D9        | CAC <10 vs. $\geq$ 10  | 1.5    | 0.4  | 0.1 | 1.9                     |
|           |                    |                            | Log(CAC+1)             | 0.6    | 0.7  | 0.1 | 1.4                     |
| rs6994682 | 8q22.2             | 26.7 kb from MIR4471       | CAC <10 vs. $\geq$ 10  | 1.8    | 1.1  | 0.2 | 2.2                     |
|           |                    |                            | Log(CAC+1)             | 2.4    | 1.1  | 0.4 | 2.4                     |
| rs439314  | 9p21.2             | 261.4 kb from LOC100506422 | CAC <10 vs. $\geq$ 10  | 1.6    | 0.1  | 0.2 | 1.0                     |
|           |                    |                            | Log(CAC+1)             | 2.2    | 0.6  | 0.0 | 2.6                     |
| rs7933164 | 11p15.4            | STIM1                      | CAC <10 vs. $\geq$ 10  | 0.1    | 2.2  | 0.5 | 1.4                     |
|           |                    |                            | Log(CAC+1)             | 0.2    | 1.9  | 1.3 | 2.1                     |
| rs6590705 | 11q25              | OPCML                      | CAC <10 vs. $\geq$ 10  | 1.9    | 0.9  | 0.9 | 3.6                     |
|           |                    |                            | Log(CAC+1)             | 1.5    | 0.5  | 0.8 | 2.7                     |
| rs7492028 | 13q32.1            | 77.3 kb from HS6ST3        | CAC <10 vs. $\geq$ 10  | 3.7    | 0.0  | 0.0 | 2.5                     |
|           |                    |                            | Log(CAC+1)             | 3.9    | 0.0  | 0.0 | 2.9                     |

**Supplemental Table 3. Admixture mapping of coronary artery calcified plaque treated as a binary outcome (cases CAC  $\geq 10$ ; controls CAC  $< 10$ ), largest LOD per chromosome.**

| Chromosome | Position         | SNP              | LOD        | Model            | Beta          | Std Error     | P-value        |
|------------|------------------|------------------|------------|------------------|---------------|---------------|----------------|
| <b>1</b>   | <b>199992413</b> | <b>rs7530895</b> | <b>2.9</b> | <b>Recessive</b> | <b>-2.661</b> | <b>0.729</b>  | <b>2.6E-04</b> |
| <b>2</b>   | <b>5033361</b>   | <b>rs9309717</b> | <b>2.5</b> | <b>Dominant</b>  | <b>0.794</b>  | <b>0.2348</b> | <b>7.2E-04</b> |
| 3          | 30007534         | rs2197896        | 1.8        | Recessive        | -1.579        | 0.5466        | 3.9E-03        |
| <b>4</b>   | <b>142113495</b> | <b>rs1872861</b> | <b>2.6</b> | <b>Dominant</b>  | <b>-1.471</b> | <b>0.4411</b> | <b>4.2E-04</b> |
| 5          | 39207788         | rs12657366       | 1.4        | Recessive        | -2.179        | 0.8574        | 1.1E-02        |
| 6          | 105717639        | rs1190286        | 1.6        | Recessive        | -1.634        | 0.5983        | 6.3E-03        |
| 7          | 84793614         | rs7807771        | 2.2        | Recessive        | -2.696        | 0.8548        | 1.6E-03        |
| 8          | 101490974        | rs6994682        | 2.5        | Recessive        | -2.215        | 0.6529        | 6.9E-04        |
| 9          | 26369840         | rs439314         | 2.3        | Recessive        | -2.193        | 0.6739        | 1.1E-03        |
| 10         | 131538677        | rs7100028        | 2.2        | Additive         | -0.674        | 0.2136        | 1.6E-03        |
| <b>11</b>  | <b>132839732</b> | <b>rs6590705</b> | <b>3.4</b> | <b>Recessive</b> | <b>-2.263</b> | <b>0.5717</b> | <b>7.6E-05</b> |
| 12         | 115433412        | rs7969190        | 2.2        | Recessive        | -2.159        | 0.6862        | 1.7E-03        |
| <b>13</b>  | <b>56527759</b>  | <b>rs790325</b>  | <b>2.9</b> | <b>Recessive</b> | <b>-2.444</b> | <b>0.6649</b> | <b>2.4E-04</b> |
| 14         | 44385429         | rs17115651       | 1.8        | Additive         | -0.657        | 0.2288        | 4.1E-03        |
| 15         | 85301162         | rs2859553        | 1.7        | Recessive        | -1.776        | 0.6293        | 4.8E-03        |
| 16         | 56672535         | rs7191378        | 1.6        | Recessive        | -2.302        | 0.8484        | 6.7E-03        |
| 17         | 60833655         | rs2904210        | 2.3        | Dominant         | 0.777         | 0.2375        | 1.1E-03        |
| 18         | 73185272         | rs874299         | 1.2        | Dominant         | 0.501         | 0.2151        | 2.0E-02        |
| 19         | 37779881         | rs10553          | 2.4        | Recessive        | 2.051         | 0.6217        | 9.7E-04        |
| 20         | 61629948         | rs310644         | 1.9        | Recessive        | -1.482        | 0.505         | 3.3E-03        |
| 21         | 32634146         | rs2833775        | 0.7        | Recessive        | -1.042        | 0.5612        | 6.3E-02        |
| 22         | 47082281         | rs742022         | 2.0        | Recessive        | -2.421        | 0.8018        | 2.5E-03        |

**Supplemental Table 4. Admixture mapping of coronary artery calcified plaque treated as continuous outcome after logarithm transformation, largest LOD per chromosome.**

| Chromosome | Position         | SNP              | LOD        | Model            | Beta           | Std Error     | P-value        |
|------------|------------------|------------------|------------|------------------|----------------|---------------|----------------|
| <b>1</b>   | <b>53782034</b>  | <b>rs6663966</b> | <b>3.7</b> | <b>Dominant</b>  | <b>1.3614</b>  | <b>0.3286</b> | <b>3.7E-05</b> |
| 2          | 5033361          | rs9309717        | 2.3        | Dominant         | 0.8535         | 0.2641        | 1.3E-03        |
| 3          | 9092788          | rs9825026        | 1.9        | Recessive        | -2.1800        | 0.7306        | 2.9E-03        |
| <b>4</b>   | <b>82512488</b>  | <b>rs1712373</b> | <b>3.0</b> | <b>Recessive</b> | <b>-1.8449</b> | <b>0.4939</b> | <b>2.0E-04</b> |
| 5          | 38254937         | rs4869577        | 1.8        | Additive         | 0.5982         | 0.2093        | 4.4E-03        |
| 6          | 143457111        | rs4489173        | 1.6        | Dominant         | 0.8206         | 0.3034        | 7.0E-03        |
| 7          | 3716791          | rs6977305        | 1.8        | Additive         | -0.5694        | 0.1952        | 3.6E-03        |
| <b>8</b>   | <b>101490974</b> | <b>rs6994682</b> | <b>2.7</b> | <b>Recessive</b> | <b>-2.6140</b> | <b>0.7351</b> | <b>4.0E-04</b> |
| <b>9</b>   | <b>26369840</b>  | <b>rs439314</b>  | <b>2.7</b> | <b>Recessive</b> | <b>-2.6844</b> | <b>0.7558</b> | <b>4.0E-04</b> |
| 10         | 1401286          | rs10794743       | 1.7        | Recessive        | -2.4276        | 0.8540        | 4.6E-03        |
| <b>11</b>  | <b>4050526</b>   | <b>rs7933164</b> | <b>2.5</b> | <b>Recessive</b> | <b>-2.0256</b> | <b>0.5914</b> | <b>6.4E-04</b> |
| 12         | 74600665         | rs7967984        | 2.0        | Recessive        | -1.9360        | 0.6404        | 2.6E-03        |
| <b>13</b>  | <b>96367097</b>  | <b>rs7492028</b> | <b>2.8</b> | <b>Dominant</b>  | <b>-1.0026</b> | <b>0.2801</b> | <b>3.6E-04</b> |
| 14         | 66596315         | rs2144061        | 1.9        | Additive         | -0.8626        | 0.2911        | 3.1E-03        |
| 15         | 85301162         | rs2859553        | 2.0        | Recessive        | -2.1625        | 0.7143        | 2.5E-03        |
| 16         | 56672535         | rs7191378        | 2.1        | Recessive        | -3.0064        | 0.9585        | 1.8E-03        |
| 17         | 60833655         | rs2904210        | 2.3        | Dominant         | 0.8836         | 0.2689        | 1.1E-03        |
| 18         | 9690456          | rs1869735        | 1.2        | Dominant         | 0.8479         | 0.3611        | 1.9E-02        |
| 19         | 37779881         | rs10553          | 1.7        | Recessive        | 1.7471         | 0.6200        | 4.9E-03        |
| 20         | 61629948         | rs310644         | 1.2        | Recessive        | -1.3337        | 0.5660        | 1.9E-02        |
| 21         | 15607469         | rs722098         | 0.9        | Additive         | -0.4889        | 0.2353        | 3.8E-02        |
| 22         | 47082281         | rs742022         | 1.8        | Recessive        | -2.65706       | 0.90864       | 3.5E-03        |

**Table 5a: Coarse fine mapping of coronary artery calcified plaque on chromosome 1 (nearest gene, GLIS1)**

| SNP                           | Position<br>(hg18) | Alleles    | Frequency   |             | Delta       | Dominant model |             |                 | Same model conditioning on sentinel SNP |           |           |
|-------------------------------|--------------------|------------|-------------|-------------|-------------|----------------|-------------|-----------------|-----------------------------------------|-----------|-----------|
|                               |                    |            | YRI         | CEU         |             | Estimate       | Std Error   | P-Value         | Estimate                                | Std Error | P-Value   |
| rs1288373                     | 53579402           | T/C        | 0.58        | 0.04        | 0.53        | 0.56           | 0.46        | 0.225E-01       | 0.18                                    | 0.47      | 0.7006    |
| rs1288509                     | 53755911           | C/G        | 0.17        | 0.85        | 0.68        | 0.27           | 0.33        | 4.18E-01        | -0.12                                   | 0.35      | 0.7241    |
| <b>rs6663966<sup>*†</sup></b> | <b>53782034</b>    | <b>C/A</b> | <b>0.26</b> | <b>1.00</b> | <b>0.74</b> | <b>1.48</b>    | <b>0.33</b> | <b>1.11E-05</b> | <b>NA</b>                               | <b>NA</b> | <b>NA</b> |
| rs10788957                    | 54035689           | T/C        | 0.21        | 0.92        | 0.70        | 0.69           | 0.33        | 3.71E-02        | 0.35                                    | 0.34      | 0.3046    |
| rs12079966                    | 54408585           | G/C        | 0.18        | 0.91        | 0.73        | 0.70           | 0.30        | 2.17E-02        | 0.43                                    | 0.31      | 0.1664    |
| rs1556528                     | 54796767           | A/G        | 0.29        | 0.93        | 0.64        | 0.81           | 0.39        | 3.67E-02        | 0.49                                    | 0.40      | 0.2227    |
| rs6656290                     | 54943752           | T/C        | 0.55        | 0.02        | 0.53        | 0.98           | 0.43        | 2.29E-02        | 0.61                                    | 0.44      | 0.1676    |
| rs299872                      | 55014160           | C/T        | 0.16        | 0.69        | 0.53        | 0.10           | 0.39        | 7.90E-01        | -0.14                                   | 0.39      | 0.7202    |
| rs449484                      | 55030530           | G/A        | 0.30        | 0.86        | 0.57        | -0.01          | 0.45        | 9.84E-01        | -0.49                                   | 0.46      | 0.2841    |
| rs1702003                     | 55060362           | G/A        | 0.56        | 0.02        | 0.54        | 0.50           | 0.44        | 2.53E-01        | 0.02                                    | 0.45      | 0.9680    |
| rs683880                      | 55546895           | T/C        | 0.19        | 0.78        | 0.59        | 0.57           | 0.38        | 1.31E-01        | 0.26                                    | 0.38      | 0.4907    |
| rs7534516                     | 55979412           | G/A        | 0.06        | 0.58        | 0.53        | 0.48           | 0.34        | 1.56E-01        | 0.14                                    | 0.35      | 0.6774    |
| rs4926690                     | 56056400           | G/A        | 0.04        | 0.63        | 0.59        | 0.04           | 0.30        | 9.01E-01        | -0.24                                   | 0.30      | 0.4181    |
| rs9436516                     | 56123166           | G/A        | 0.26        | 0.95        | 0.69        | 0.27           | 0.35        | 4.34E-01        | -0.15                                   | 0.36      | 0.6718    |
| rs7553801                     | 56427400           | A/G        | 0.23        | 0.96        | 0.73        | 0.47           | 0.31        | 1.35E-01        | 0.10                                    | 0.33      | 0.7634    |
| rs12025982                    | 56564716           | A/G        | 0.05        | 0.56        | 0.51        | 0.40           | 0.39        | 3.16E-01        | 0.08                                    | 0.40      | 0.8334    |
| rs778406                      | 56476093           | T/G        | 0.32        | 0.96        | 0.64        | 0.48           | 0.38        | 2.05E-01        | 0.11                                    | 0.38      | 0.7794    |

\* Sentinel SNP for which the initial result was observed.



**Supplementary Table 5b: Coarse fine mapping of coronary artery calcified plaque on chromosome 9**

| SNP              | Position (hg18) | Alleles    | Frequency   | Delta       | Recessive model |              |             | Same model conditioning on sentinel SNP |           |           |           |
|------------------|-----------------|------------|-------------|-------------|-----------------|--------------|-------------|-----------------------------------------|-----------|-----------|-----------|
|                  |                 |            | YRI         | CEU         |                 | Estimate     | Std Error   | P-Value                                 | Estimate  | Std Error | P-Value   |
| rs12340520       | 25587291        | A/G        | 0.33        | 0.93        | 0.76            | -2.12        | 0.91        | 1.96E-02                                | -1.18     | 0.9469    | 0.21      |
| rs1937939        | 25700869        | T/G        | 0.25        | 0.86        | 0.61            | -2.01        | 0.88        | 2.29E-02                                | -1.29     | 0.9085    | 0.16      |
| rs4978012        | 25721796        | C/G        | 0.18        | 0.75        | 0.58            | -1.72        | 0.87        | 4.87E-02                                | -0.81     | 0.9113    | 0.37      |
| rs1231375        | 25755952        | T/C        | 0.15        | 0.87        | 0.70            | -1.16        | 0.71        | 1.02E-01                                | -0.45     | 0.7361    | 0.54      |
| rs1220081        | 25792486        | C/A        | 0.26        | 0.8         | 0.52            | -2.91        | 1.11        | 8.70E-03                                | -2.52     | 1.1104    | 0.02      |
| rs10738735       | 25882559        | C/T        | 0.23        | 0.96        | 0.67            | -1.25        | 0.76        | 1.02E-01                                | -0.49     | 0.7945    | 0.54      |
| rs637039         | 25941211        | C/T        | 0.16        | 0.88        | 0.73            | -0.71        | 0.78        | 3.62E-01                                | 0.05      | 0.8049    | 0.95      |
| rs564225         | 25970121        | G/C        | 0.36        | 0.93        | 0.57            | -2.07        | 0.91        | 2.39E-02                                | -1.39     | 0.9783    | 0.16      |
| rs7033724        | 26167022        | T/A        | 0.18        | 0.93        | 0.75            | -1.58        | 0.66        | 1.60E-02                                | -0.61     | 0.7411    | 0.41      |
| rs1529827        | 26203626        | C/A        | 0.32        | 0.88        | 0.56            | -2.71        | 1.01        | 7.62E-03                                | -1.34     | 1.1518    | 0.24      |
| rs2618024        | 26276392        | C/T        | 0.16        | 0.73        | 0.58            | -3.13        | 1.01        | 2.13E-03                                | -2.16     | 1.0714    | 0.04      |
| <b>rs439314*</b> | <b>26369840</b> | <b>A/C</b> | <b>0.31</b> | <b>0.99</b> | <b>0.68</b>     | <b>-3.06</b> | <b>0.77</b> | <b>7.70E-05</b>                         | <b>NA</b> | <b>NA</b> | <b>NA</b> |
| rs959697         | 26607589        | G/A        | 0.26        | 0.76        | 0.50            | -1.51        | 1.14        | 1.83E-01                                | -0.04     | 1.2213    | 0.97      |
| rs10812461       | 26776862        | C/T        | 0.26        | 0.58        | 0.43            | -2.40        | 1.54        | 1.19E-01                                | -1.20     | 1.5950    | 0.45      |
| rs12338945       | 27260176        | G/A        | 0.32        | 0.83        | 0.51            | -4.99        | 1.72        | 3.75E-03                                | -3.88     | 1.7657    | 0.03      |
| rs7044345        | 27296595        | G/C        | 0.6         | 0.01        | 0.58            | -1.30        | 0.85        | 1.25E-01                                | -0.61     | 0.8660    | 0.48      |
| rs10118453       | 27336663        | T/C        | 0.56        | 0.03        | 0.53            | -2.22        | 0.92        | 1.59E-02                                | -1.67     | 0.9336    | 0.07      |
| rs4879540        | 27527479        | A/T        | 0.08        | 0.59        | 0.51            | -1.94        | 1.08        | 7.30E-02                                | -1.02     | 1.1118    | 0.36      |
| rs10732349       | 27725305        | A/G        | 0.58        | 0.05        | 0.52            | -2.44        | 0.95        | 1.00E-02                                | -1.79     | 0.9649    | 0.06      |
| rs4879740        | 27750375        | G/A        | 0.69        | 0.03        | 0.67            | -1.37        | 0.71        | 5.43E-02                                | -0.88     | 0.7228    | 0.23      |

\* Sentinel SNP for which the initial result was observed.

**Supplementary Table 5c: Coarse fine mapping of coronary artery calcified plaque on chromosome 11**

| SNP               | Position (hg18) | Alleles    | Frequency   |             | Delta       | Recessive model |             |                 | Same model conditioning on sentinel SNP |           |           |
|-------------------|-----------------|------------|-------------|-------------|-------------|-----------------|-------------|-----------------|-----------------------------------------|-----------|-----------|
|                   |                 |            | YRI         | CEU         |             | Estimate        | Std Error   | P-Value         | Estimate                                | Std Error | P-Value   |
| rs11022922        | 2479195         | T/C        | 0.19        | 0.82        | 0.63        | -2.02           | 0.89        | 2.29E-02        | -1.34                                   | 0.92      | 0.1440    |
| rs10832134        | 2502486         | C/T        | 0.17        | 0.62        | 0.52        | 0.04            | 1.08        | 9.71E-01        | 0.65                                    | 1.09      | 0.5546    |
| rs11023094        | 2527361         | A/G        | 0.37        | 0.79        | 0.50        | 0.27            | 1.28        | 8.31E-01        | 1.29                                    | 1.33      | 0.3319    |
| rs4930137         | 2630594         | C/T        | 0.24        | 0.83        | 0.61        | -2.12           | 0.93        | 2.25E-02        | -1.33                                   | 0.96      | 0.1662    |
| rs231887          | 2739180         | C/T        | 0.6         | 0.1         | 0.51        | -1.93           | 0.99        | 5.26E-02        | -1.21                                   | 1.01      | 0.2326    |
| rs3852527         | 2826603         | G/A        | 0.4         | 0.87        | 0.45        | -1.59           | 1.13        | 1.58E-01        | -0.40                                   | 1.18      | 0.7333    |
| rs438384          | 3045651         | T/C        | 0.01        | 0.43        | 0.46        | -1.83           | 0.84        | 3.06E-02        | -1.15                                   | 0.87      | 0.1839    |
| rs2100087         | 3106604         | T/C        | 0.46        | 0.01        | 0.45        | -1.92           | 1.05        | 6.69E-02        | -1.09                                   | 1.07      | 0.3113    |
| rs10742077        | 3641703         | G/C        | 0.21        | 0.86        | 0.65        | -0.76           | 0.74        | 3.10E-01        | 0.07                                    | 0.78      | 0.9325    |
| rs4910581         | 3643964         | G/T        | 0.24        | 0.86        | 0.62        | -1.10           | 0.81        | 1.73E-01        | -0.17                                   | 0.86      | 0.8414    |
| rs7120836         | 3841463         | G/A        | 0.14        | 0.77        | 0.64        | -0.76           | 0.77        | 3.20E-01        | 0.22                                    | 0.81      | 0.7910    |
| <b>rs7933164*</b> | <b>4050526</b>  | <b>C/A</b> | <b>0.11</b> | <b>0.88</b> | <b>0.79</b> | <b>-2.36</b>    | <b>0.60</b> | <b>8.90E-05</b> | <b>NA</b>                               | <b>NA</b> | <b>NA</b> |
| rs12276850        | 4401360         | G/A        | 0.29        | 0.9         | 0.61        | -1.55           | 0.90        | 8.64E-02        | -0.37                                   | 0.98      | 0.7028    |
| rs7130283         | 4463048         | C/G        | 0.59        | 0.01        | 0.58        | 0.80            | 0.84        | 3.41E-01        | 1.20                                    | 0.85      | 0.1590    |
| rs331537          | 4471276         | A/G        | 0.23        | 0.97        | 0.74        | -1.23           | 0.67        | 6.70E-02        | -0.24                                   | 0.74      | 0.7500    |
| rs7110328         | 4500876         | A/G        | 0.29        | 0.98        | 0.72        | 0.55            | 0.67        | 4.18E-01        | 1.29                                    | 0.70      | 0.0674    |
| rs10768113        | 4629210         | T/C        | 0.21        | 0.94        | 0.74        | -0.52           | 0.65        | 4.20E-01        | 0.27                                    | 0.68      | 0.6948    |
| rs4625457         | 4659187         | A/C        | 0.2         | 0.74        | 0.54        | 0.03            | 0.92        | 9.70E-01        | 1.24                                    | 0.97      | 0.2019    |
| rs2124447         | 4995989         | G/A        | 0.34        | 0.87        | 0.59        | -1.93           | 1.03        | 6.08E-02        | -0.62                                   | 1.10      | 0.5713    |

\* Sentinel SNP for which the initial result was observed.

**Supplementary Table 6a: Summary of results in other samples for coronary artery calcified plaque treated as continuous outcome after logarithm transformation**

| Initial result |         | MESA AA Non-diabetic |         | MESA EA Diabetic |         | MESA EA Non-Diabetic |         | DHS EA Diabetic |         |
|----------------|---------|----------------------|---------|------------------|---------|----------------------|---------|-----------------|---------|
| SNP            | Region  | SNP                  | P-value | SNP              | P-value | SNP                  | P-value | SNP             | P-value |
| rs6663966      | 1p32.3  | rs1181183            | 2.9E-04 | rs10888802       | 1.8E-03 | rs2948047            | 1.5E-02 | rs17392743      | 1.0E-03 |
| rs7530895      | 1q32.1  | rs495886             | 8.9E-04 | rs2271763        | 2.0E-04 | rs16849691           | 2.0E-04 | rs7534078       | 6.8E-03 |
| rs9309717      | 2p25.3  | rs17019832           | 2.4E-04 | rs12464169       | 2.3E-03 | rs11123565           | 3.2E-03 | rs17509530      | 4.0E-04 |
| rs1712373      | 4q21.2  | rs4565072            | 6.4E-04 | rs13353802       | 8.8E-03 | rs7696473            | 7.3E-03 | rs9998218       | 5.0E-03 |
| rs1872861      | 4q31.1  | rs17354582           | 8.7E-03 | rs11726692       | 2.5E-04 | rs17007294           | 4.7E-03 | Not available   |         |
| rs6994682      | 8q22.2  | rs7002825            | 2.3E-05 | rs7842985        | 4.7E-03 | rs7016579            | 1.9E-03 | rs1125111       | 3.5E-03 |
| rs439314       | 9p21.2  | rs1843467            | 1.1E-04 | rs7874407        | 1.9E-02 | rs1999461            | 1.8E-03 | rs16910448      | 5.8E-03 |
| rs7933164      | 11p15.4 | rs7126968            | 6.0E-04 | rs7119248        | 1.9E-05 | rs276888             | 6.5E-04 | rs12277512      | 5.6E-03 |
| rs6590705      | 11q25   | rs4936204            | 6.1E-04 | rs7130004        | 8.9E-03 | rs713278             | 3.8E-03 | rs7936936       | 1.3E-02 |
| rs790325       | 13q21.1 | rs12869811           | 1.5E-03 | rs213280         | 4.0E-04 | rs17054168           | 3.7E-03 | rs8000204       | 1.1E-02 |
| rs7492028      | 13q32.1 | rs1336099            | 3.3E-03 | rs7324153        | 3.6424  | rs9300366            | 2.1E-03 | rs16953068      | 5.1E-03 |

**Supplementary Table 6b: Summary of results in other samples for coronary artery calcified plaque treated as a binary outcome (cases CAC  $\geq$ 10; controls CAC <10)**

| Initial result |         | MESA AA Non-diabetic |         | MESA EA Diabetic |         | MESA EA Non-Diabetic |         | DHS EA Diabetic |         |
|----------------|---------|----------------------|---------|------------------|---------|----------------------|---------|-----------------|---------|
| SNP            | Region  | SNP                  | P-value | SNP              | P-value | SNP                  | P-value | SNP             | P-value |
| rs6663966      | 1p32.3  | rs12069945           | 2.2E-04 | rs17387330       | 3.6E-03 | rs12731127           | 8.1E-03 | rs17392743      | 8.0E-04 |
| rs7530895      | 1q32.1  | rs12044612           | 1.9E-03 | rs1022361        | 1.5E-03 | rs1736450            | 1.9E-03 | rs2993655       | 5.8E-03 |
| rs9309717      | 2p25.3  | rs11688192           | 8.7E-04 | rs12464169       | 1.8E-03 | rs12464169           | 8.2E-03 | rs17509530      | 1.6E-03 |
| rs1712373      | 4q21.2  | rs4565072            | 9.8E-04 | rs10213073       | 1.2E-02 | rs9992933            | 4.7E-03 | rs17004865      | 1.1E-03 |
| rs1872861      | 4q31.1  | rs17006636           | 6.1E-03 | rs10222880       | 1.5E-03 | rs6537004            | 4.2E-03 | Not available   |         |
| rs6994682      | 8q22.2  | rs7002825            | 8.7E-04 | rs4734457        | 1.3E-02 | rs879390             | 8.1E-03 | rs1460930       | 1.8E-02 |
| rs439314       | 9p21.2  | rs17692968           | 5.6E-05 | rs10967250       | 1.9E-02 | rs1336466            | 4.7E-04 | rs16910448      | 1.6E-02 |
| rs7933164      | 11p15.4 | rs7119863            | 2.1E-04 | rs276885         | 1.5E-05 | rs276888             | 2.4E-04 | rs16907254      | 2.2E-03 |
| rs6590705      | 11q25   | rs1453833            | 1.7E-03 | rs12791420       | 1.5E-02 | rs11223506           | 8.7E-04 | rs3758927       | 9.9E-03 |
| rs790325       | 13q21.1 | rs12869811           | 4.0E-03 | rs213280         | 2.1E-03 | rs17054168           | 1.7E-03 | rs8000204       | 4.5E-03 |
| rs7492028      | 13q32.1 | rs7321303            | 7.6E-03 | rs7324153        | 2.5E-04 | rs7335011            | 9.7E-03 | rs16953622      | 2.0E-02 |
